# Supplementary material for: Selective vapor-phase formation of dimethylformamide via oxidative coupling of methanol and dimethylamine over bimetallic catalysts
Source: Royal Society of Chemistry journal article supplement (doi:10.1039/d3cy01655b), 2024-01-01
Supplement: d3cy01655b1.pdf [file d3cy01655b1.pdf]

**Selective Vapor-Phase Formation of Dimethylformamide via Oxidative Coupling of Methanol and  
Dimethylamine over Bimetallic Catalysts**

SUPPORTING INFORMATION

Alexander P. Minne, Tristan Maxson, Tibor Szilvási, and James W. Harris\*

Department of Chemical and Biological Engineering,

The University of Alabama, Tuscaloosa, AL, 35487

\*Corresponding author: [james.harris@eng.ua.edu](mailto:james.harris@eng.ua.edu)

## Table of Contents

|                                                                                                |               |
|------------------------------------------------------------------------------------------------|---------------|
| <b>S.1 Values of O<sub>2</sub> Adsorption and Dissociation on Single Crystal Surfaces.....</b> | <b>pg. 3</b>  |
| <b>S.2 Process Flow Diagram.....</b>                                                           | <b>pg. 4</b>  |
| <b>S.3 Nitrogen Physisorption Isotherms.....</b>                                               | <b>pg. 5</b>  |
| <b>S.4 SEM/TEM Images.....</b>                                                                 | <b>pg. 6</b>  |
| <b>S.5 TEM Images of Used Catalyst Samples.....</b>                                            | <b>pg. 9</b>  |
| <b>S.6 XRD Data.....</b>                                                                       | <b>pg. 12</b> |
| <b>S.7 UV-Vis Data.....</b>                                                                    | <b>pg. 13</b> |
| <b>S.8 GradientCheck Calculations.....</b>                                                     | <b>pg. 14</b> |
| <b>S.9 Methanol Self-coupling Data .....</b>                                                   | <b>pg. 16</b> |
| <b>S.10 DMF Apparent Activation Energy and Reaction Orders.....</b>                            | <b>pg.18</b>  |
| <b>S.11 CO<sub>2</sub> Apparent Activation Energy and Reaction Orders.....</b>                 | <b>pg. 22</b> |
| <b>S.12 Example Transient Data with Long Time on Stream.....</b>                               | <b>pg. 24</b> |
| <b>S.13 DMF Co-fed Data.....</b>                                                               | <b>pg.25</b>  |
| <b>S.14 Pd, PdAu, and PdCu Rate and Selectivity Comparison Data.....</b>                       | <b>pg.26</b>  |
| <b>S.15 DFT Computational Inputs.....</b>                                                      | <b>pg. 27</b> |
| <b>S.16 References.....</b>                                                                    | <b>pg. 29</b> |

### S.1. Values of O<sub>2</sub> Adsorption and Dissociation on Single Crystal Surfaces

| <b>Table S.1.</b> Values of O <sub>2</sub> adsorption and dissociation on pure Au surfaces. |                                                             |                                                                |        |
|---------------------------------------------------------------------------------------------|-------------------------------------------------------------|----------------------------------------------------------------|--------|
| Facet                                                                                       | O <sub>2</sub> Adsorption Energy<br>(kJ mol <sup>-1</sup> ) | O <sub>2</sub> Dissociation Barrier<br>(kJ mol <sup>-1</sup> ) | Source |
| Au(111)                                                                                     | -7.72 <sup>α</sup>                                          | 132 <sup>α</sup>                                               | 1      |
| Au(211)                                                                                     | -14.5 <sup>α</sup>                                          | 108 <sup>α</sup>                                               | 2      |
| Au(321)                                                                                     | -16.4 <sup>α</sup>                                          | 96.5 <sup>α</sup>                                              | 3      |
| AgAu(211)                                                                                   | Not Reported                                                | 21.2 <sup>β</sup>                                              | 4      |
| Ag(111)                                                                                     | -38.6 <sup>β</sup>                                          | 34.7 <sup>β</sup>                                              | 5      |
| Ag(110)                                                                                     | -38.6 <sup>β</sup>                                          | 32.8 <sup>β</sup>                                              | 5      |
| Ag(100)                                                                                     | -65.6 <sup>α</sup>                                          | Not Reported                                                   | 6      |
| Pd(111)                                                                                     | -87.8 <sup>α</sup>                                          | 68.5 <sup>α</sup>                                              | 7      |
| Pd(110)                                                                                     | -125 <sup>α</sup>                                           | 16.4 <sup>α</sup>                                              | 8      |
| Pd(100)                                                                                     | -73.3 <sup>α</sup>                                          | 11.6 <sup>α</sup>                                              | 9      |
| <sup>α</sup> theory/calculated<br><sup>β</sup> experimental                                 |                                                             |                                                                |        |

## S.2. Process Flow Diagram

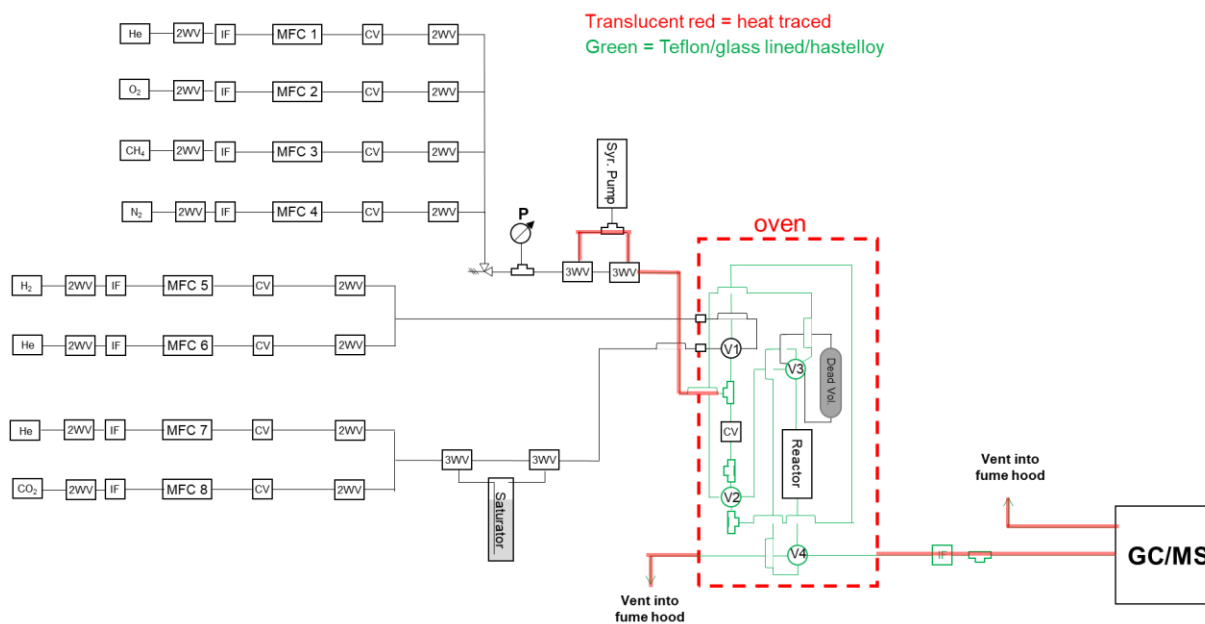

Figure S.1. Process flow diagram for the apparatus used for kinetic measurements.

### S.3. Nitrogen Physisorption Isotherms

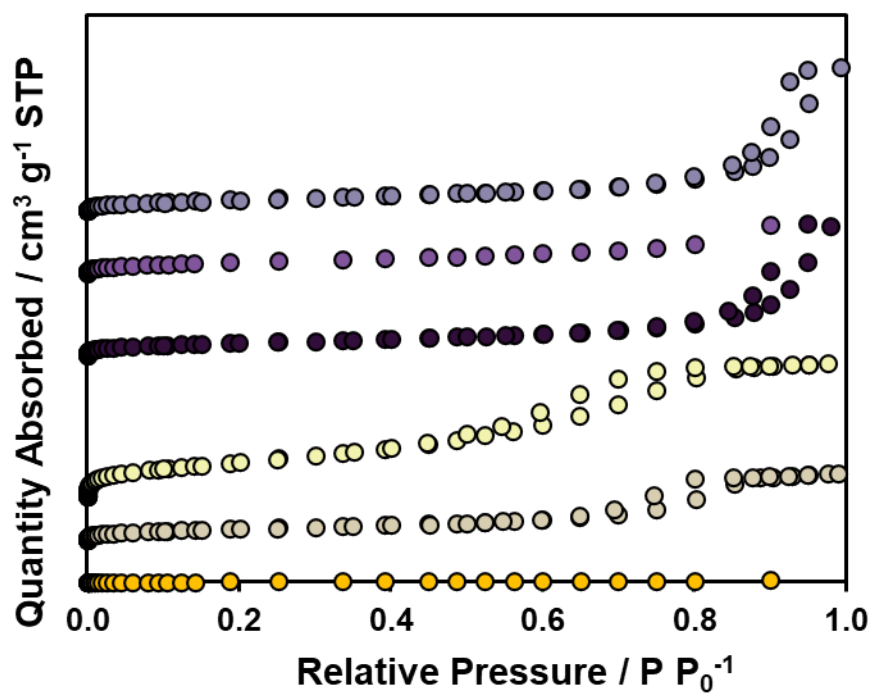

**Figure S.2.** N<sub>2</sub> physisorption isotherms for (top to bottom) 1:53 PdAu/SiO<sub>2</sub>, 1:10 PdAu/SiO<sub>2</sub>, 1:2 PdAu/SiO<sub>2</sub>, Pd/SiO<sub>2</sub>, 1:15 AgAu/SiO<sub>2</sub>, and nanoporous gold.

#### S.4. SEM/TEM Images

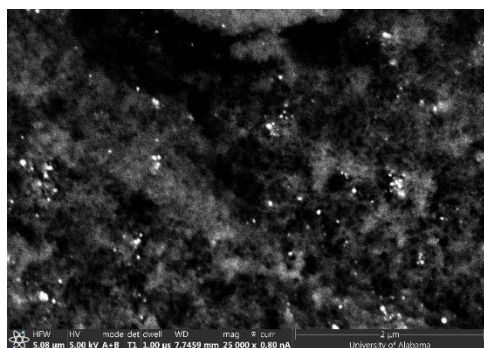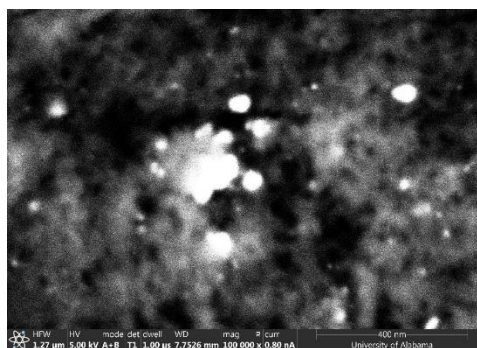

Figure S.3. SEM images of 1:2 PdAu/SiO<sub>2</sub>.

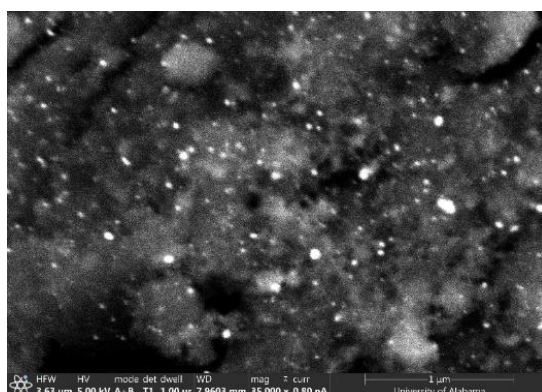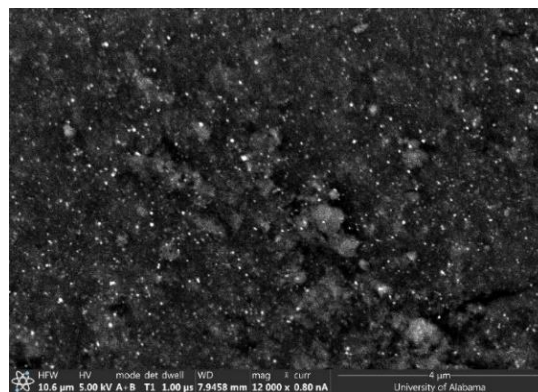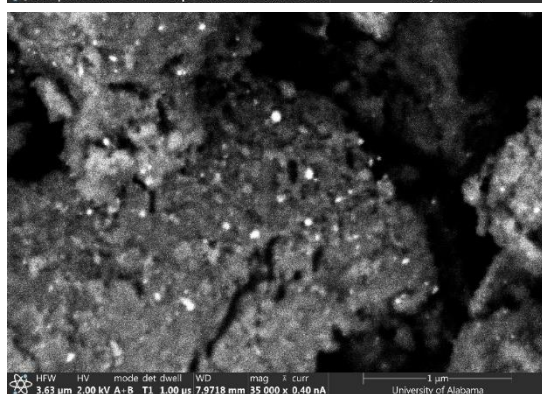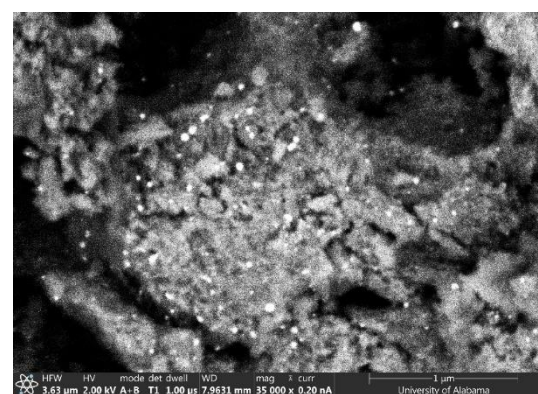

Figure S.4. SEM images of 1:15 AgAu/SiO<sub>2</sub>.

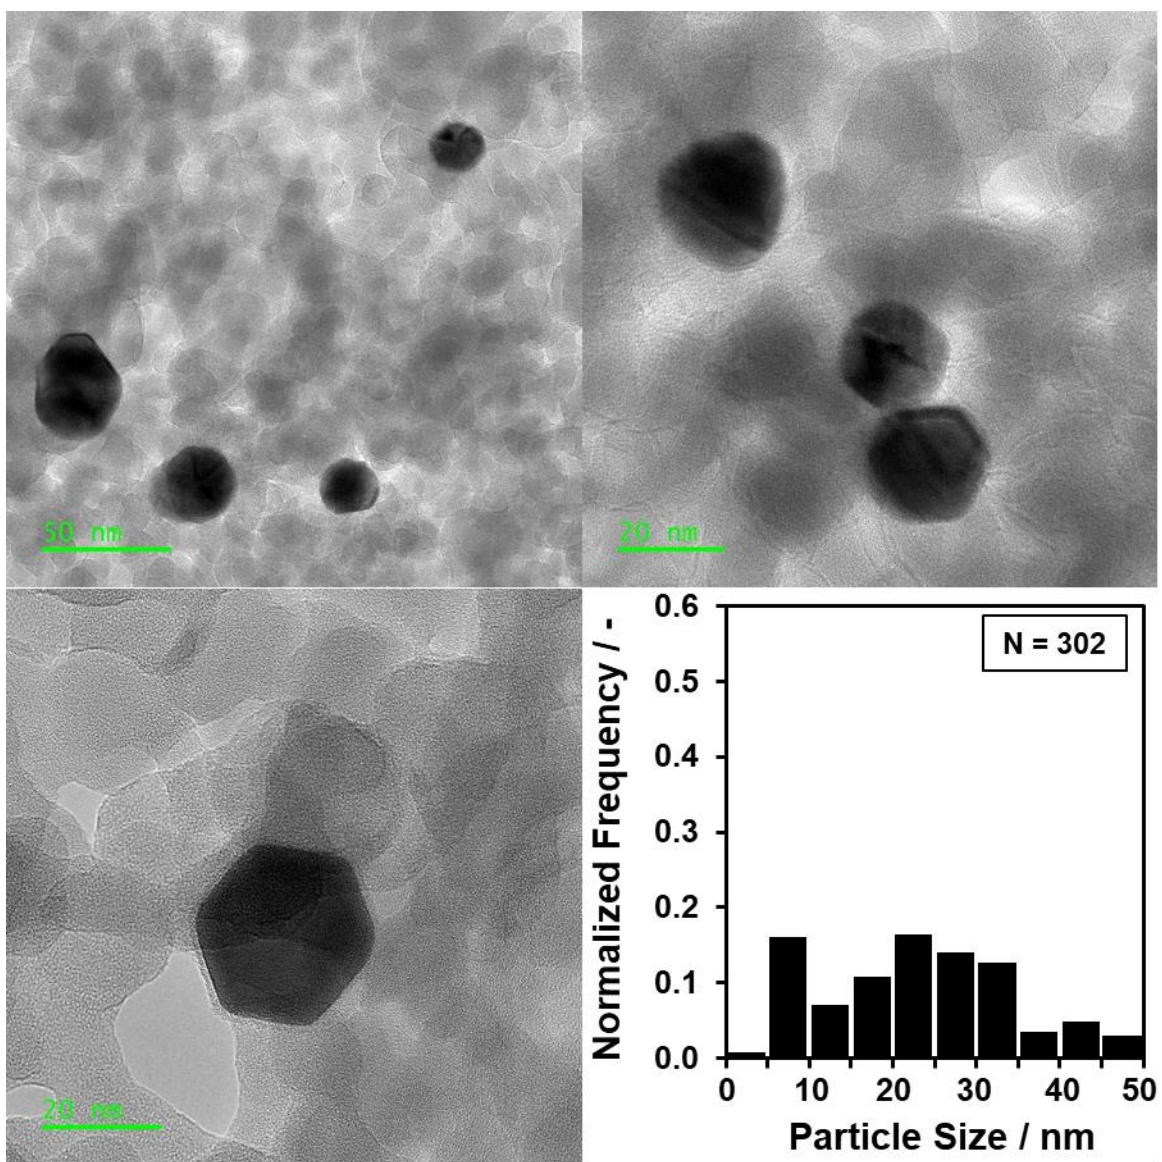

**Figure S.5.** TEM images and particle size distribution of 1:2 PdAu/SiO<sub>2</sub>.

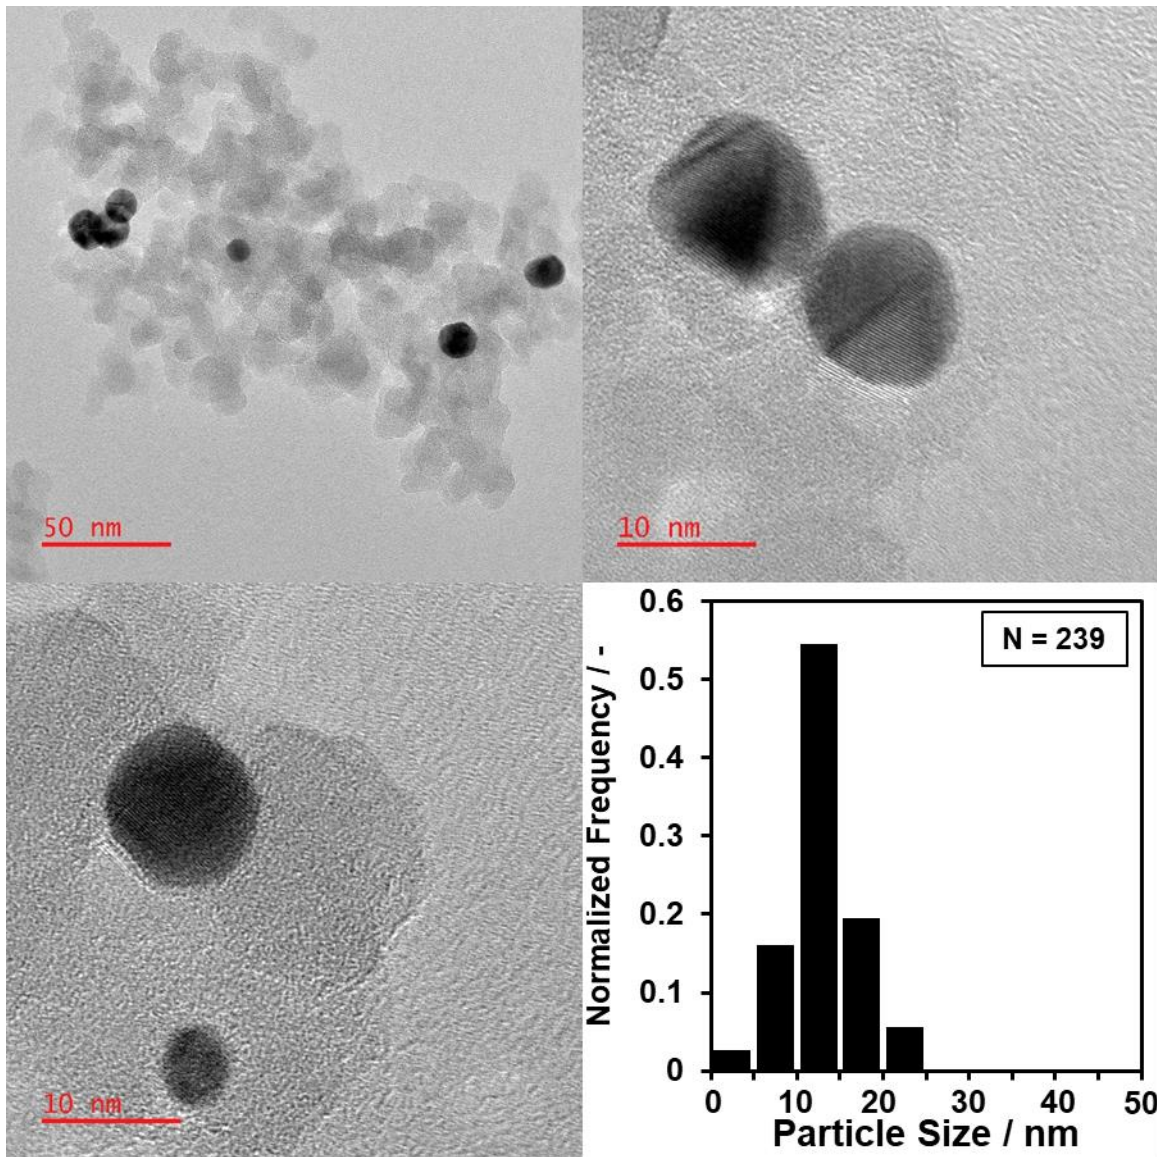

Figure S.6 TEM images and particle size distribution of 1:53 PdAu/SiO<sub>2</sub>.



## S.5 TEM Images of Used Catalyst Samples

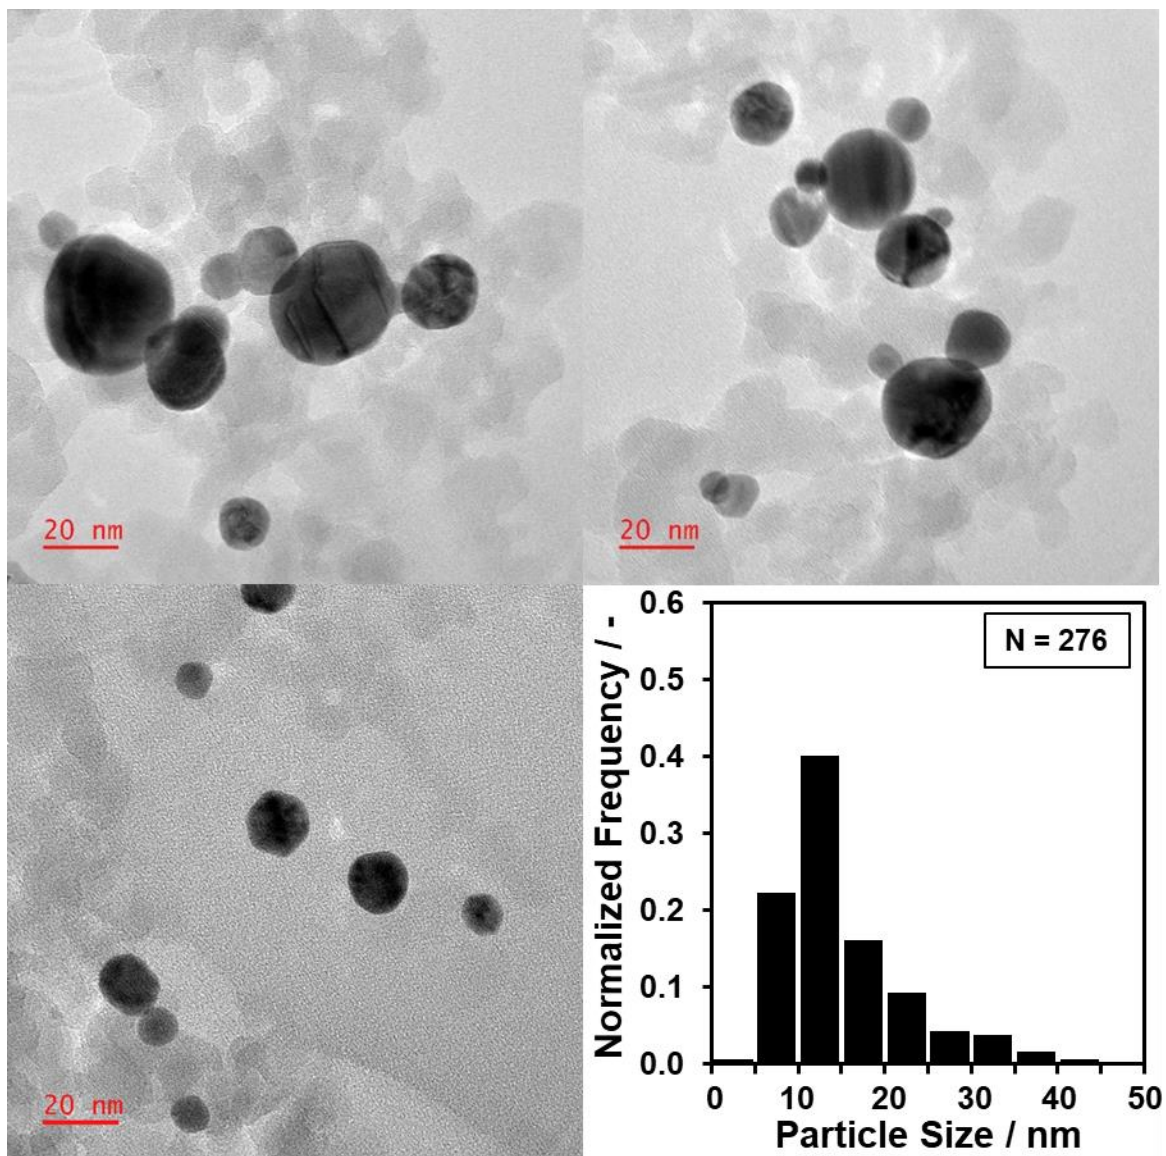

**Figure S.7.** TEM images and particle size distribution of used 1:10 PdAu/SiO<sub>2</sub>. This particle sample was subjected to multiple kinetic experiments at various conditions, approximately 100 hours of time on stream. Average particle size was shown to be  $15.3 \pm 7.3$  nm.

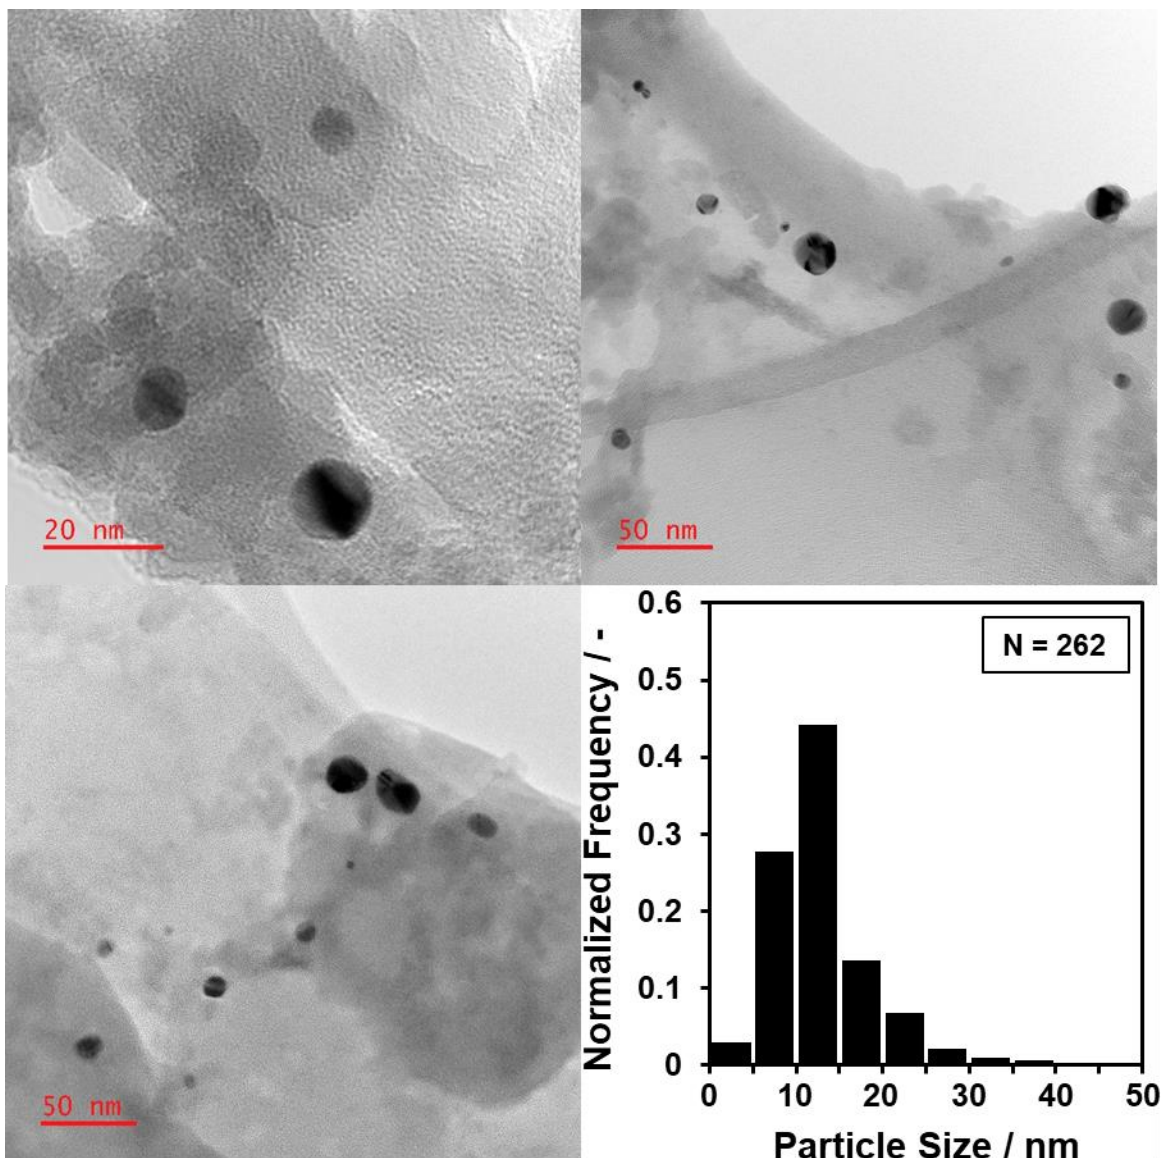

**Figure S.8.** TEM images and particle size distribution of used 1:15 AgAu/SiO<sub>2</sub>. This particle sample was subjected to multiple kinetic experiments at various conditions, approximately 100 hours of time on stream. Average particle size was shown to be  $13.0 \pm 5.8$  nm.

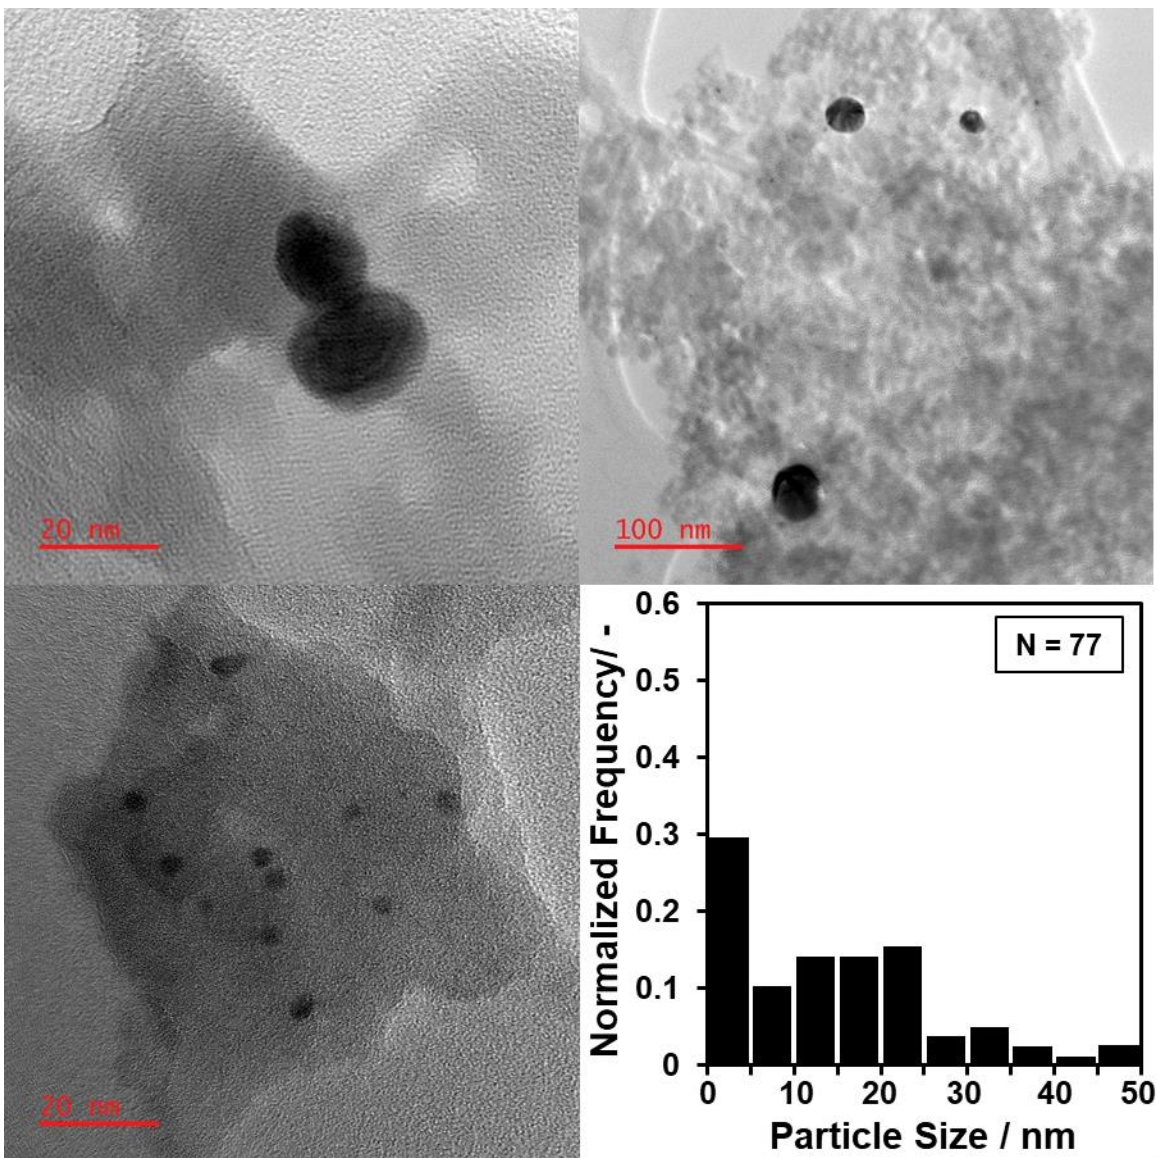

**Figure S.9.** TEM images and particle size distribution of used Pd/SiO<sub>2</sub>. This particle sample was subjected to multiple kinetic experiments at various conditions, approximately 100 hours of time on stream. Average particle size was shown to be  $15.1 \pm 11.2$  nm.

## S.6. XRD Data

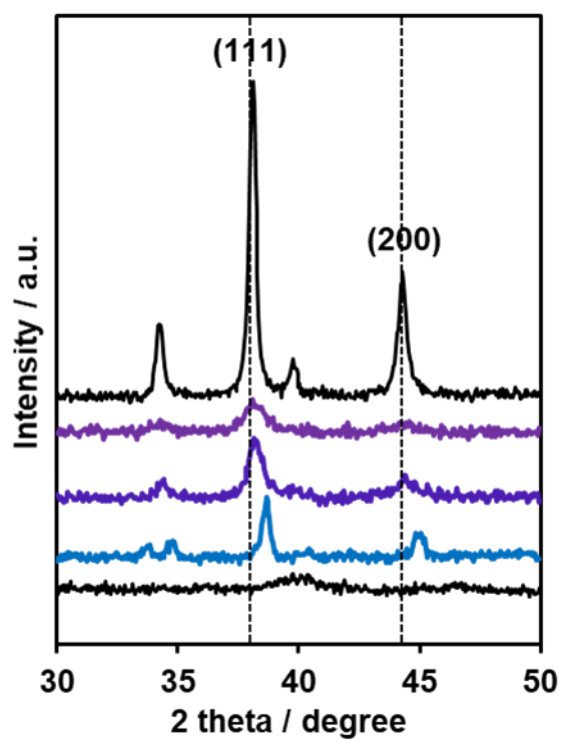

**Figure S.10.** X-ray diffraction patterns for Au, Pd and PdAu/SiO<sub>2</sub> catalysts. From top to bottom; Au/SiO<sub>2</sub> (black), 1:53 PdAu/SiO<sub>2</sub> (light purple), 1:10 PdAu/SiO<sub>2</sub> (dark purple), 1:2 PdAu/SiO<sub>2</sub> (blue), Pd/SiO<sub>2</sub> (black).

## S.7. UV-Vis Data

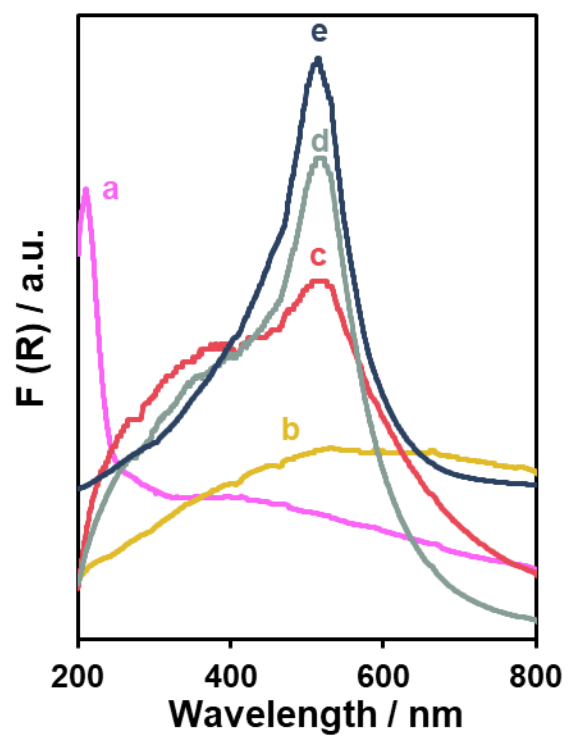

**Figure S.11.** Diffuse reflectance UV-Visible spectra of catalysts used in this study (a) Pd/SiO<sub>2</sub> (b) 1:2 PdAu/SiO<sub>2</sub> (c) 1:10 PdAu/SiO<sub>2</sub> (d) 1:53 PdAu/SiO<sub>2</sub> (e) Au/SiO<sub>2</sub>.

## S.8 GradientCheck Calculations

The GradientCheck tool developed by Hickman et al.<sup>10</sup> was used to assess the relevance of heat and mass transfer limitations to the rates observed in this study. A screenshot of the example output files for the highest rates measured in this study are shown in Figure S.7.1. The authors note that GradientCheck does not allow in input of more than two reactants and such cannot accurately reflect all 3 reactants present in this work. For the sake of including the methanol and dimethylamine, the largest and the coupled molecules, oxygen was left out of the calculations. Based on these results, we concluded that heat and mass transfer limitations were likely irrelevant based on the rates measured in this study, and thus the rates reported are limited solely by kinetics and not by diffusion.

|                                            |                                                                                 |            |             |                     |                                                                               |
|--------------------------------------------|---------------------------------------------------------------------------------|------------|-------------|---------------------|-------------------------------------------------------------------------------|
| Reaction Phase:                            | Gas Phase <input type="button" value="v"/> / default: Gas Phase                 |            |             |                     |                                                                               |
| Temperature ( $T_b$ & $T_w$ ):             | 398 / K                                                                         |            |             |                     |                                                                               |
| Pressure (P):                              | 1.43 / bar                                                                      |            |             |                     |                                                                               |
| <hr/>                                      |                                                                                 |            |             |                     |                                                                               |
| Reactor Radius ( $R_r$ ):                  | 0.00635 / m -- [Accepts scientific notation e.g. 1e-3]                          |            |             |                     |                                                                               |
| Bed Length ( $L_b$ ):                      | 0.003 / m                                                                       |            |             |                     |                                                                               |
| Catalyst Particle Shape:                   | Spheres <input type="button" value="v"/>                                        |            |             |                     |                                                                               |
| Particle Radius ( $R_p$ ):                 | 0.00025 / m                                                                     |            |             |                     |                                                                               |
| <hr/>                                      |                                                                                 |            |             |                     |                                                                               |
| Observed Reaction Rate ( $r_{obs}$ ):      | 3.87936E-08 / moles of A $\times$ kg-cat <sup>-1</sup> $\times$ s <sup>-1</sup> |            |             |                     |                                                                               |
| Enthalpy of Reaction ( $\Delta H_{rxn}$ ): | 39520 / J $\times$ mole <sup>-1</sup>                                           |            |             |                     |                                                                               |
| Reaction Order (n):                        | 0 <input type="button" value="v"/>                                              |            |             |                     |                                                                               |
| Activation Energy ( $E_{app}$ ):           | -54000 / J $\times$ mole <sup>-1</sup>                                          |            |             |                     |                                                                               |
| Conversion ( $X_A$ ):                      | 0.05 / unitless (0 to 1)                                                        |            |             |                     |                                                                               |
| <hr/>                                      |                                                                                 |            |             |                     |                                                                               |
| Catalyst Bulk Density ( $\rho_{bulk}$ ):   | 38 / kg $\times$ m <sup>-3</sup> [usually 500-1500]                             |            |             |                     |                                                                               |
| Catalyst Void Fraction ( $\epsilon$ ):     | 0.4 / (0 to 1) [often 0.35-0.45 (default 0.4)]                                  |            |             |                     |                                                                               |
| Catalyst Thermal Conductivity ( $k_p$ ):   | 0.02 / W $\times$ m <sup>-1</sup> $\times$ K <sup>-1</sup> [often 0.13-0.25]    |            |             |                     |                                                                               |
| Catalyst Surface Area ( $S_{int}$ ):       | 158 / m <sup>2</sup> $\times$ g <sup>-1</sup>                                   |            |             |                     |                                                                               |
| Catalyst Pore Volume ( $V_{pore}$ ):       | 2.1698e-7 / m <sup>3</sup> $\times$ g <sup>-1</sup>                             |            |             |                     |                                                                               |
| Catalyst Pore Tortuosity ( $\tau$ ):       | 1.1 / unitless [often 3-7 for porous catalysts]                                 |            |             |                     |                                                                               |
| <hr/>                                      |                                                                                 |            |             |                     |                                                                               |
| Number of Reactants:                       | Two <input type="button" value="v"/>                                            |            |             | Number of Products: | One <input type="button" value="v"/>                                          |
|                                            | Main Reactant A                                                                 | Reactant B | Product C   | Diluent D           |                                                                               |
| Inlet Mole Fractions:                      | 0.02                                                                            | 0.0006     | 2.85687E-06 | 0.979397143         | / must add to 1                                                               |
| Fluid Viscosity ( $\mu_f$ ):               | 0.001258                                                                        | 0.0018994  | 0.00092     | 0.000024            | / kg $\times$ m <sup>-1</sup> $\times$ s <sup>-1</sup>                        |
| Heat Capacity ( $C_p$ ):                   | 0.00362                                                                         | 1855       | 1610        | 10395               | / J $\times$ kg <sup>-1</sup> $\times$ K <sup>-1</sup>                        |
| Thermal Conductivity ( $k_f$ ):            | 0.202                                                                           | 0.11       | 0.1660      | 0.15                | / W $\times$ m <sup>-1</sup> $\times$ K <sup>-1</sup>                         |
| Diffusion Volume ( $\Sigma_{v,i}$ ):       | 28.9                                                                            | 52.4       | 74.4        | 2.7                 | <input type="button" value="Estimate &lt;math&gt;\Sigma_{v,i}&lt;/math&gt;"/> |
| Molecular Weight (MW):                     | 31                                                                              | 45.1       | 73.1        | 4                   | / g $\times$ mol <sup>-1</sup>                                                |

Figure S.12. Inputs for GradientCheck.

|                                                   |           |                                                                                         |
|---------------------------------------------------|-----------|-----------------------------------------------------------------------------------------|
| $r_{\text{obs}} < r_{\text{max}}$                 | no        | Is the observed reaction rate realistic?                                                |
| $\sum y_i = 1$                                    | yes       | Do the mole fractions add to one?                                                       |
| $0.25 < \varepsilon < 0.55$                       | yes       | Is the void fraction within typical range?                                              |
| $0.1 < k_p < 1$                                   | no        | Is the particle conductivity within typical range?                                      |
| $\varepsilon_p < 0.7$                             | yes       | Is the porosity within typical range?                                                   |
| $2 < \tau < 6$                                    | no        | Is the tortuosity within typical range?                                                 |
| $0.5 < Pr < 1.5$                                  | no        | Is the Prandtl number within typical range for a gas?                                   |
| $Re_{\text{Liq}} > 0.01$ or $Re_{\text{Gas}} > 1$ | no        | Is the Reynolds number within the valid range for j-factor correlations?                |
| <hr/>                                             |           |                                                                                         |
| $\beta > 0.3$                                     | Undefined | Are multiple steady states possible?                                                    |
| $(C_b - C_s)/C_b > 5\%$                           | yes!      | Does external diffusion limit reaction rate?                                            |
| $(C_b - C_s)/C_b > 50\%$                          | yes!      | Does external diffusion control reaction rate?                                          |
| $ T_b - T_s  > 1 \text{ K}$                       | Undefined | Is the external temperature gradient significant?                                       |
| $ T_s - T_c  > 1 \text{ K}$                       | Undefined | Is the internal temperature gradient significant?                                       |
| $\eta < 0.95$                                     | Undefined | Does pore diffusion limit reaction rate?                                                |
| $\eta < 0.5$                                      | Undefined | Does pore diffusion strongly affect reaction rate?                                      |
| <hr/>                                             |           |                                                                                         |
| $\Delta P > 0.2P$                                 | no        | Is the bed pressure drop greater than 20% of the total pressure?                        |
| + Mears Axial Dispersion                          | no        | Does axial dispersion have a large effect upon rate?                                    |
| + Gierman Axial Dispersion                        | no        | Does axial dispersion have a large effect upon rate?                                    |
| + Sie Wall Effects                                | no        | Do broad radial velocity profiles negatively effect the reactant RTD?                   |
| + Mears Radial Interparticle                      | yes!      | Does a radial interparticle heat transport limitation indicate a nonisothermal reactor? |

**Figure S.13.** Results for GradientCheck calculations.

### S.9. Methanol Self-coupling Data

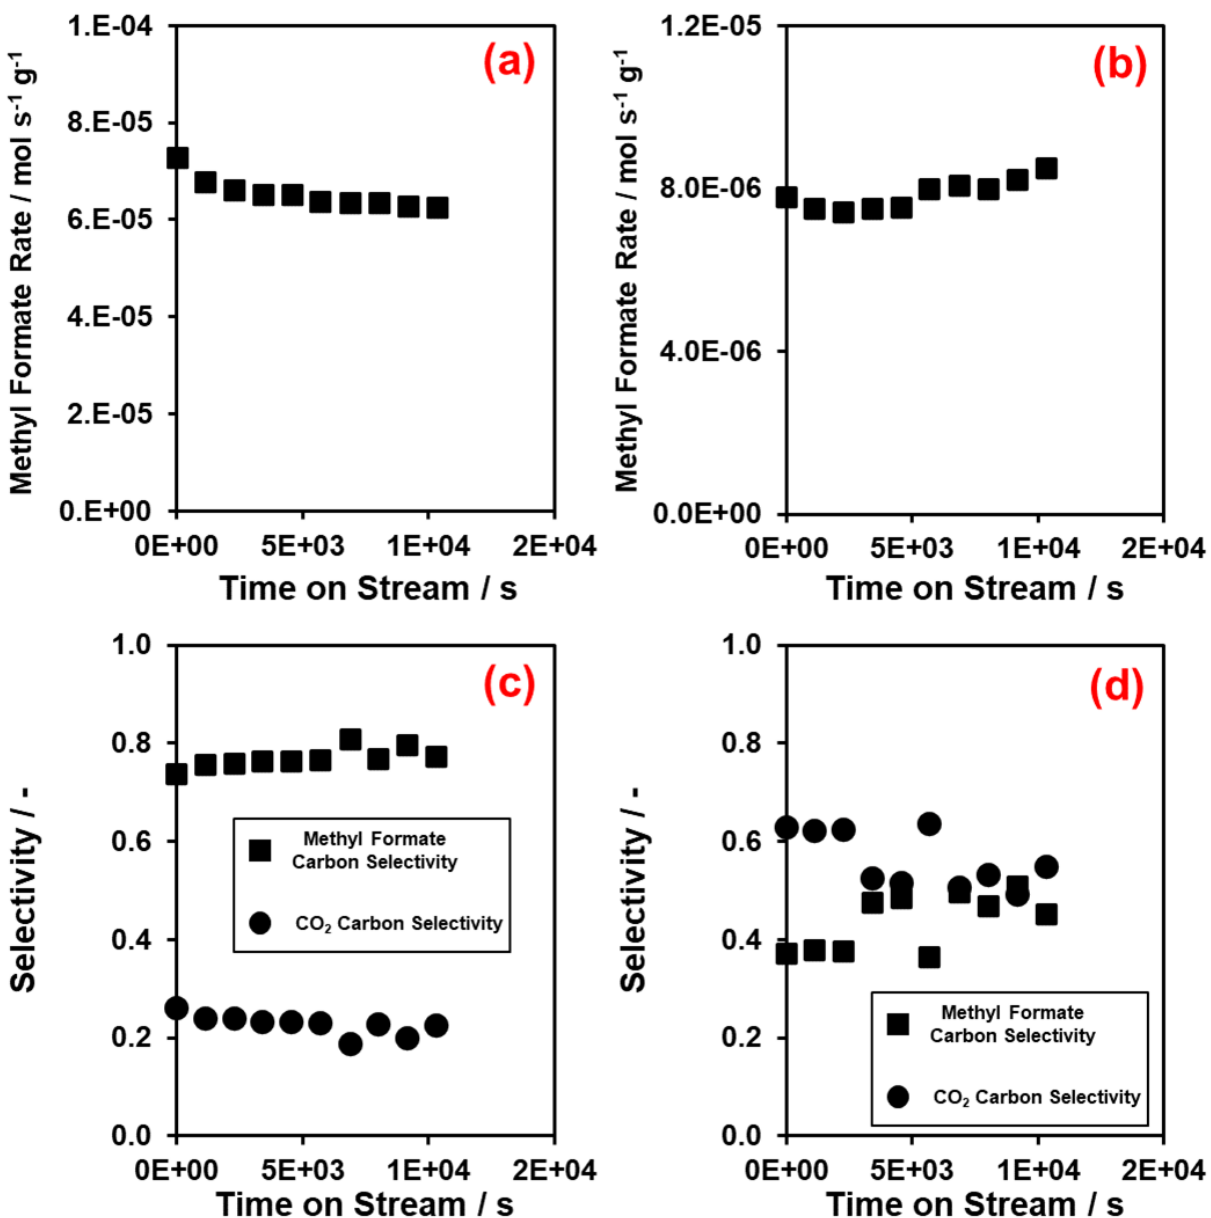

**Figure S.14.** (a) Time on stream data showing methyl formate production from npAu during gas-phase oxidative self-coupling of methanol. (b) Time on stream data showing methyl formate production from Ag/SiO<sub>2</sub> during gas-phase oxidative self-coupling of methanol. (c) Carbon selectivity of methanol self-coupling during gas-phase oxidative self-coupling of methanol on npAu. (d) Carbon selectivity of methanol self-coupling during gas-phase oxidative self-coupling of methanol on Ag/SiO<sub>2</sub>. Reaction Conditions: 143 kPa (2.9 kPa methanol, 1.4 kPa O<sub>2</sub>, 1.4 kPa CH<sub>4</sub>, , balance He), 448 K, npAu mass: 43.3 mg, Ag/SiO<sub>2</sub> mass: 28.5 mg



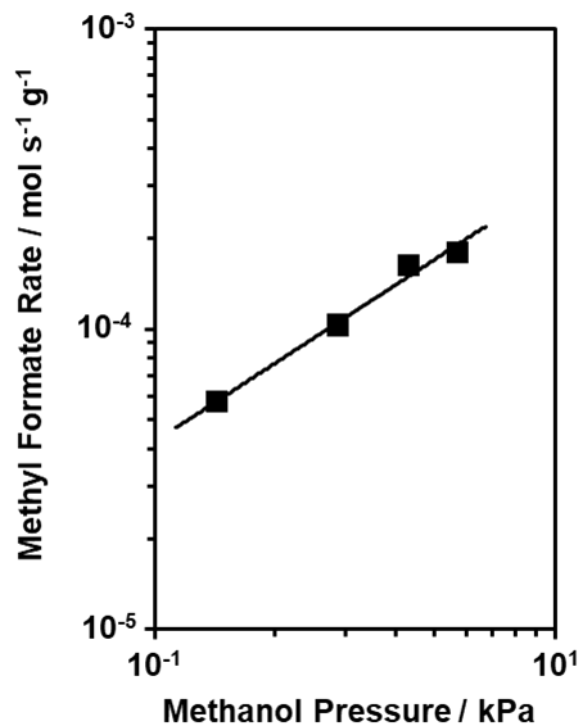

**Figure S.15.** Methanol reaction order in the oxidative coupling of methanol on npAu. Reaction conditions: 143 kPa (1.4-5.7 kPa methanol, 1.4 kPa O<sub>2</sub>, 1.4 kPa CH<sub>4</sub>, Balance He), 448K, npAu mass; 43 mg.

## S.10 DMF Apparent Activation Energy and Reaction Orders

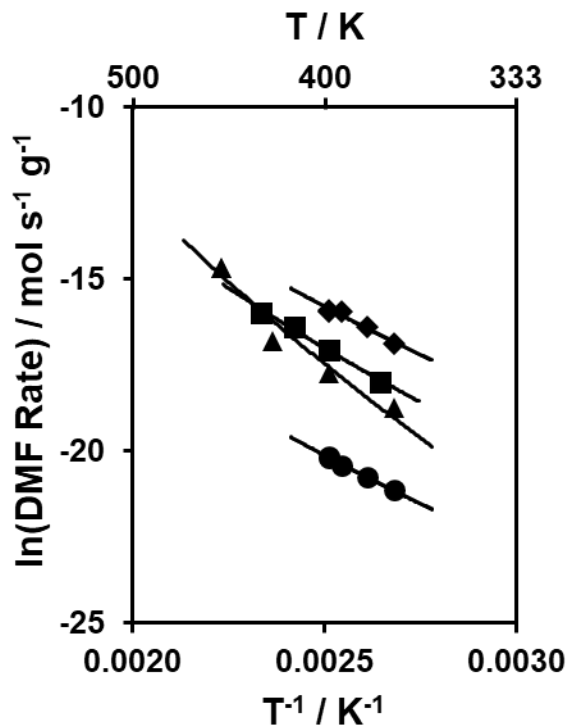

**Figure S.16.** Arrhenius plots for DMF formation rates over npAu (diamonds), 1:15 AgAu/SiO<sub>2</sub> (triangles), Pd/SiO<sub>2</sub> (circles) and 1:10 PdAu/SiO<sub>2</sub> (squares). Reaction conditions: 143 kPa total pressure (2.85 kPa methanol, 1.4 kPa O<sub>2</sub>, 0.0086 kPa DMA, balance He), 373-448 K, npAu mass ; 12.9 mg (GHSV: 170000 h<sup>-1</sup>); 1:15 AgAu/SiO<sub>2</sub> mass; 6.7 mg (GHSV: 175000 h<sup>-1</sup>); Pd/SiO<sub>2</sub> mass; 20.1 mg (GHSV: 20700 h<sup>-1</sup>); 1:10 PdAu/SiO<sub>2</sub> mass; 5.4 mg (GHSV: 197000 h<sup>-1</sup>); each diluted with Si-xerogel.

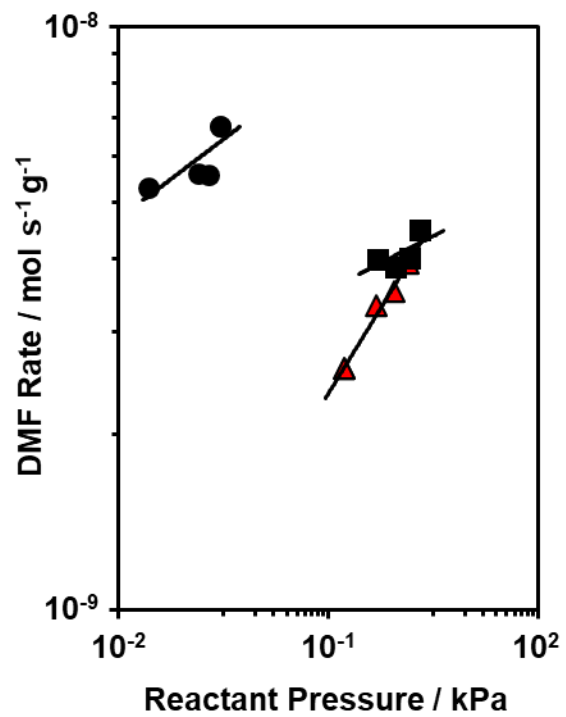

**Figure S.17.** Reaction orders of DMA (circles), O<sub>2</sub> (red triangles, color to distinguish in data overlap), and methanol (squares). Reaction conditions: 143 kPa (2.9-5.9 kPa methanol, 1.4-4.3 kPa O<sub>2</sub>, 0.019-0.094 kPa DMA, Balance He), 398K, npAu mass; 0.029 g (GHSV: 170000 h<sup>-1</sup>).

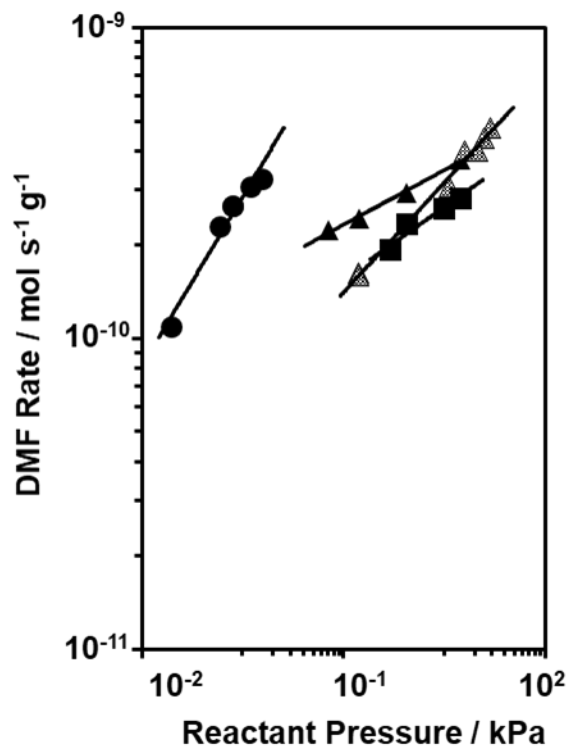

**Figure S.18.** Reaction orders of DMA (circles), O<sub>2</sub> (triangles; gray at lower O<sub>2</sub> pressures and black at higher O<sub>2</sub> pressures on the same loading of catalyst weeks apart from one another), and methanol (squares). Reaction conditions: 141 kPa (2.85-14.27 kPa methanol, 0.72-28.54 kPa O<sub>2</sub>, 0.019-0.156 kPa DMA, Balance He), 398 K, 1:15 AgAu/SiO<sub>2</sub> mass; 0.0093 g diluted in Si-xerogel (approximately twice the catalyst mass) (GHSV: 175000 h<sup>-1</sup>). Catalyst and Si-xerogel diluent sieved to 180 μm-250 μm.

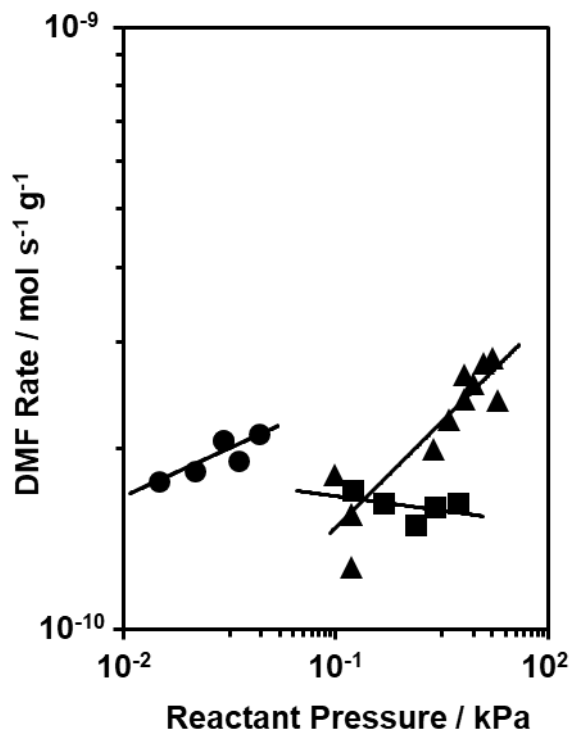

**Figure S.19.** Reaction orders of DMA (circles), O<sub>2</sub> (triangles), and methanol (squares) over Pd/SiO<sub>2</sub>. Reaction conditions: 141 kPa (1.00-5.70 kPa methanol, 1.10-8.56 kPa O<sub>2</sub>, 0.014-0.156 kPa DMA, Balance He), 398 K, Pd/SiO<sub>2</sub> mass; 0.0140-0.0201 g diluted in Si-xerogel (approximately equal the catalyst mass) mg (GHSV: 207000 h<sup>-1</sup>). Catalyst and Si-xerogel diluent sieved to 180 $\mu$ m-250  $\mu$ m.

### S.11. CO<sub>2</sub> Apparent Activation Energy and Reaction Orders

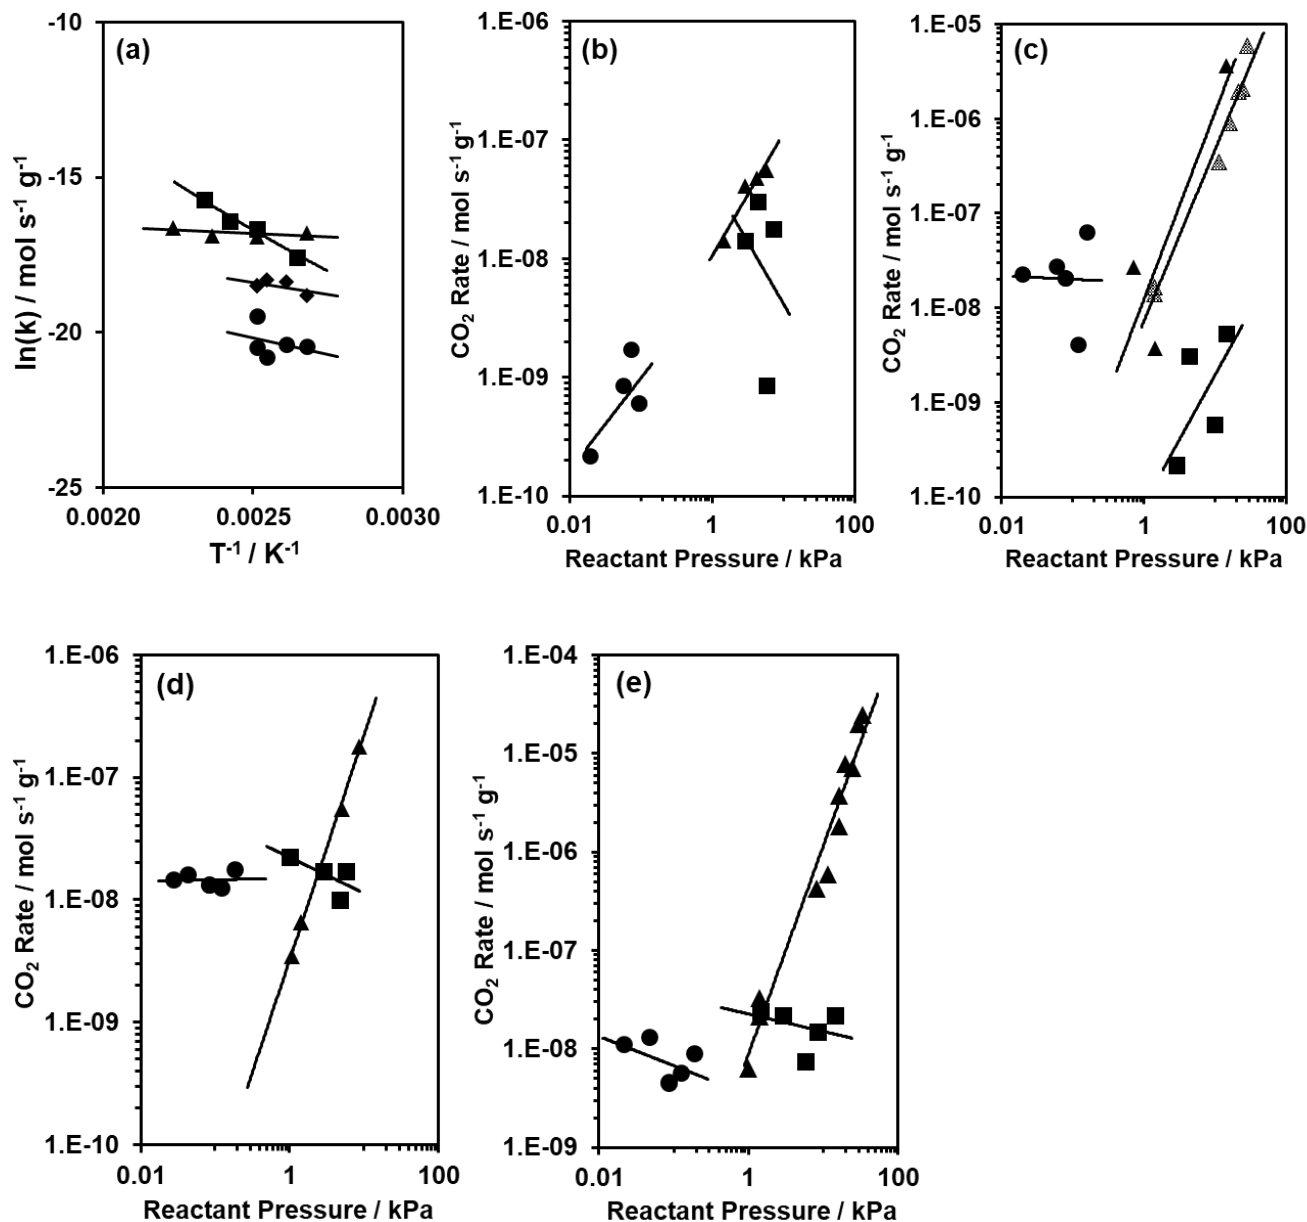

**Figure S.20.** (a) Arrhenius plots for CO<sub>2</sub> formation rates over npAu (diamonds), 1:15 AgAu/SiO<sub>2</sub> (triangles), Pd/SiO<sub>2</sub> (circles) and 1:10 PdAu/SiO<sub>2</sub> (squares). Reaction conditions: 143 kPa total pressure (2.85 kPa methanol, 1.4 kPa O<sub>2</sub>, 0.0086 kPa DMA, balance He), 373 K-448 K, AgAu/SiO<sub>2</sub> mass; 6.7 mg (WHSV: 175000 h<sup>-1</sup>); Pd/SiO<sub>2</sub> mass; 20.1 mg (WHSV: 207000 h<sup>-1</sup>); PdAu/SiO<sub>2</sub> mass; 5.4 mg (WHSV: 197000 h<sup>-1</sup>); each diluted with Si-xerogel. (b)-(e) Reaction orders of DMA (circles), O<sub>2</sub> (triangles), and methanol (squares). ((b):npAu, (c):AgAu/SiO<sub>2</sub>, (d): PdAu/SiO<sub>2</sub>, (e): Pd/SiO<sub>2</sub>). Reaction conditions: 141-143 kPa (1.00-14.27 kPa methanol, 0.72-28.54 kPa O<sub>2</sub>, 0.014-0.156 kPa DMA, Balance He), 398K, npAu mass; 0.029 g. 1:15 AgAu/SiO<sub>2</sub> mass; 0.0093 g, 1:10 PdAu/SiO<sub>2</sub> mass; 0.0054-0.0058 g, Pd/SiO<sub>2</sub> mass; 0.0140-0.0201 g, diluted in in Si-xerogel (approximately twice the catalyst mass). Catalyst and Si-xerogel diluent sieved to 180 $\mu\text{m}$ -250 $\mu\text{m}$ .

| <b>Table S.2.</b> Summary of apparent activation energies and reaction orders of various samples tested in this study. |                                                                               |                                       |                      |                 |            |
|------------------------------------------------------------------------------------------------------------------------|-------------------------------------------------------------------------------|---------------------------------------|----------------------|-----------------|------------|
| <b>Catalyst</b>                                                                                                        | <b>CO<sub>2</sub> Formation<br/>E<sub>app</sub><br/>/ kJ mol<sup>-1</sup></b> | <b>CO<sub>2</sub> reaction orders</b> |                      |                 |            |
|                                                                                                                        |                                                                               | <b>CH<sub>3</sub>OH</b>               | <b>O<sub>2</sub></b> | <b>DMA</b>      | <b>DMF</b> |
| npAu                                                                                                                   | 26 ± 11                                                                       | -1.04 ±<br>1.88                       | 1.03 ±<br>0.15       | 0.77 ±<br>0.47  | -          |
| 1:15<br>AgAu/SiO <sub>2</sub>                                                                                          | 16 ± 4                                                                        | 1.37 ±<br>0.85                        | 2.25 ±<br>0.77       | -0.04 ±<br>0.62 | -          |
| Pd/SiO <sub>2</sub>                                                                                                    | 29 ± 31                                                                       | 0.00 ±<br>0.02                        | 1.88 ±<br>0.18       | 0.09 ±<br>0.04  | -          |
| 1:10<br>PdAu/SiO <sub>2</sub>                                                                                          | 63 ± 5                                                                        | -0.18 ±<br>0.25                       | 1.39 ±<br>0.34       | -0.30 ±<br>0.27 | -          |

### S.12. Example Transient Data with Long Time on Stream

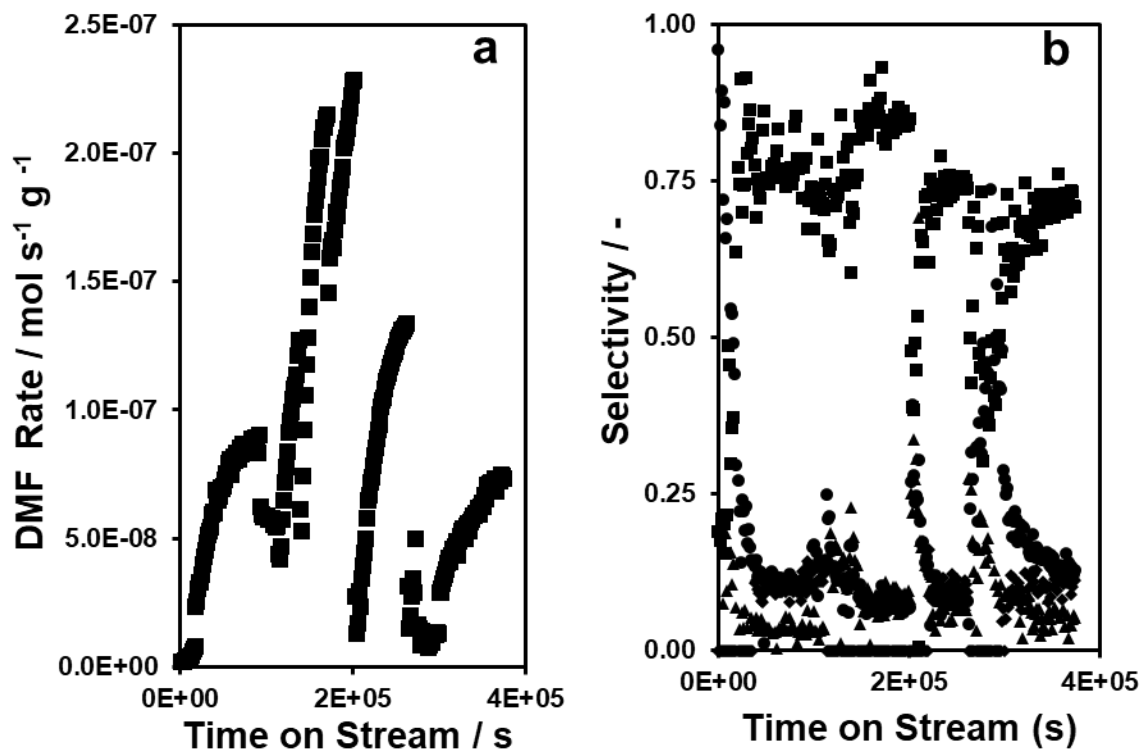

**Figure S.21.** (a) Long transients observed as a result of methanol and DMA concentration changes. (b) Selectivity during the transients is variable; DMF (squares),  $\text{CO}_2$  (circles), formaldehyde (triangles), methyl formate (diamonds). Reaction conditions: 143 kPa (2.9-14.3 kPa methanol, 1.4 kPa  $\text{O}_2$ , 0.17-0.86 kPa DMA, 1.4 kPa  $\text{CH}_4$ , Balance He), 448 K, npAu mass: 43.3 mg.



### S.13 DMF Co-fed Data

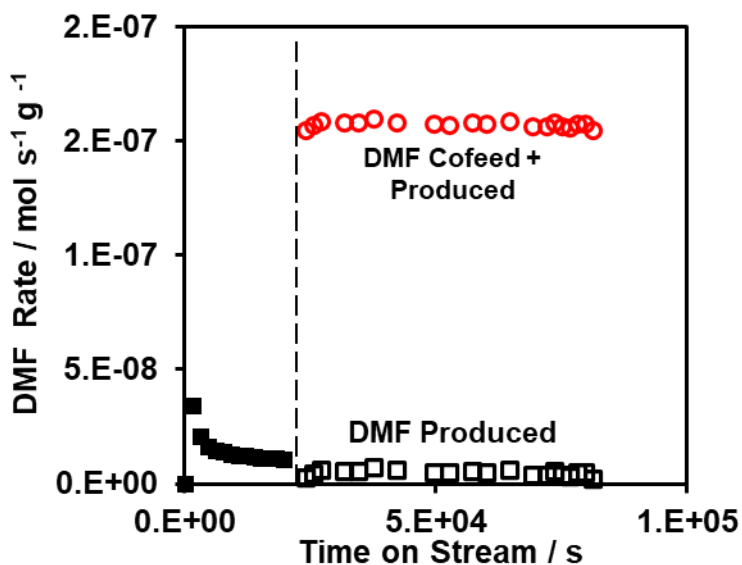

**Figure S.22.** DMF co-fed off/on. Reaction conditions: 143 kPa (2.9 kPa methanol, 1.4 kPa O<sub>2</sub>, 0.065 kPa DMA, 1.4 kPa CH<sub>4</sub>, 0.0088 kPa DMF Balance He), 398K, npAu mass; 29 mg.

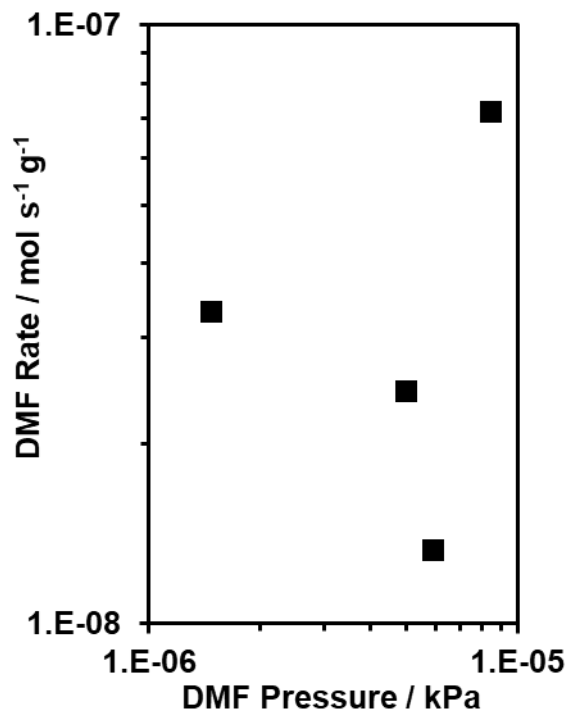

**Figure S.23.** DMF reaction order on 1:10 PdAu/SiO<sub>2</sub>. Reaction conditions: 143 kPa (2.9 kPa methanol, 1.4 kPa O<sub>2</sub>, 0.17-0.86 kPa DMA, 1.4 kPa CH<sub>4</sub>, 0.00015-0.00084 kPa DMF, balance He), 398 K, 1:8 PdAu/SiO<sub>2</sub> mass: 6.0 mg.

### S.14 Pd, PdAu, and PdCu Rate and Selectivity Comparison Data

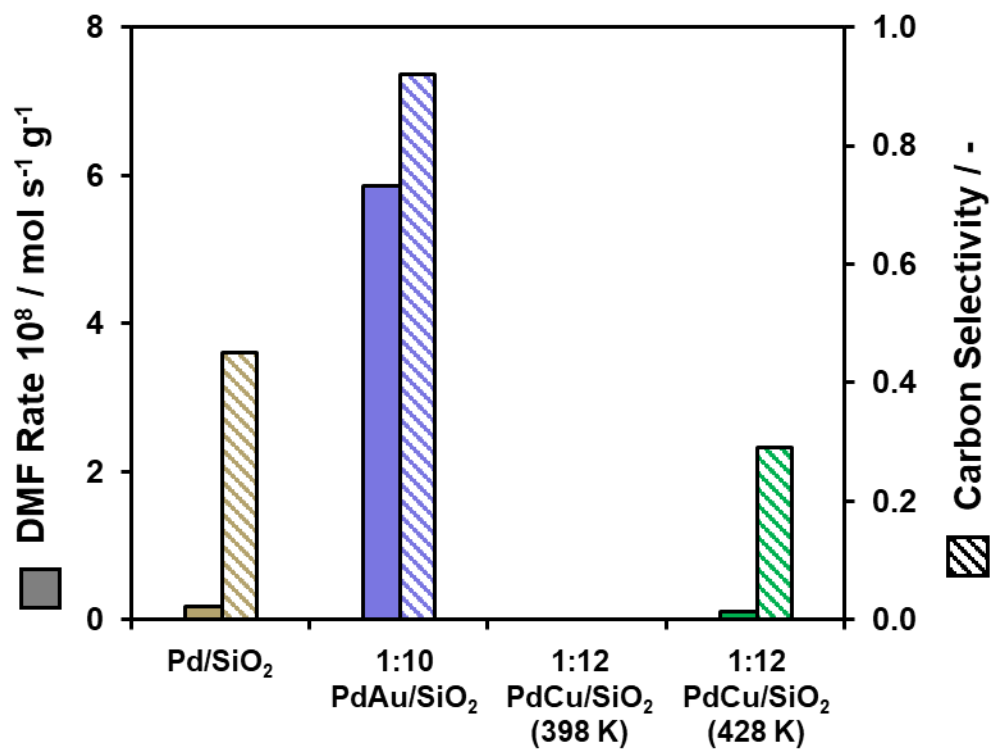

**Figure S.24.** DMF rate and selectivity of Pd/SiO<sub>2</sub>, 1:10 PdAu/SiO<sub>2</sub>, and 1:15 PdCu/SiO<sub>2</sub> with data for 1:12 PdCu/SiO<sub>2</sub> being shown at two different temperatures. Reaction Conditions: 141 kPa (2.82 kPa methanol, 1.41 kPa O<sub>2</sub>, 0.085 kPa DMA, 0.141 kPa CH<sub>4</sub>, Balance He), 398 K and 428 K, Catalyst mass; 0.005-0.015 g diluted in Si-xerogel (approximately twice the catalyst mass). Catalyst and Si-xerogel diluent sieved to 180 $\mu$ m-250 $\mu$ m.

## S.15 DFT Computational Inputs

### VASP INCAR Files (SI)

#### **INCAR for Surface Calculation**

```
ENAUG = 750.000000
ENCUT = 500.000000
POTIM = 0.200000
SIGMA = 0.200000
EDIFF = 1.00e-08
EDIFFG = -2.00e-02
ALGO = normal
GGA = PE
IBRION = 1
ICHARG = 1
ISIF = 2
ISMEAR = 0
ISTART = 1
ISYM = 0
KPAR = 1
LMAXMIX = 6
LORBIT = 10
NELM = 100
NSW = 0
IVDW = 13
VDW_S6 = 1.000000
VDW_S8 = 0.959481
VDW_A1 = 0.385750
VDW_A2 = 4.806885
NCORE = 2
LASPH = .TRUE.
LCHARG = .FALSE.
LWAVE = .FALSE.
LREAL = .FALSE.
IDIPOL = 3
LDIPOL = .TRUE.
```

#### **INCAR for Hessian Calculation**

```
ENAUG = 750.000000
ENCUT = 500.000000
POTIM = 0.0050000
SIGMA = 0.200000
EDIFF = 1.00e-08
ALGO = normal
GGA = PE
IBRION = 5
NFREE = 4
ICHARG = 1
ISIF = 2
ISMEAR = 0
ISTART = 1
ISYM = 0
```

KPAR = 1  
 LMAXMIX = 6  
 LORBIT = 10  
 NELM = 100  
 NSW = 0  
 IVDW = 13  
 VDW\_S6 = 1.000000  
 VDW\_S8 = 0.959481  
 VDW\_A1 = 0.385750  
 VDW\_A2 = 4.806885  
 NCORE = 2  
 LASPH = .TRUE.  
 LCHARG = .FALSE.  
 LWAVE = .FALSE.  
 LREAL = .FALSE.  
 IDIPOL=  
 LDIPOL= .TRUE.

3

#### VASP POTCAR Files (SI)

|    |                      |
|----|----------------------|
| Au | PAW_PBE Au 04Oct2007 |
| Pd | PAW_PBE Pd 04Jan2005 |
| Ag | PAW_PBE Ag 02Apr2005 |
| O  | PAW_PBE O 08Apr2002  |
| C  | PAW_PBE C 08Apr2002  |
| H  | PAW_PBE H 15Jun2001  |
| N  | PAW_PBE N 08Apr2002  |

#### VASP KPOINTS Files (SI)

|                                                                         |
|-------------------------------------------------------------------------|
| <b>KPOINTS for Bulk Calculations</b><br>0<br>Gamma<br>15 15 15<br>0 0 0 |
| <b>KPOINTS for Surface Calculations</b><br>0<br>Gamma<br>5 5 1<br>0 0 0 |

## S.16 References

1. Y. Xu and M. Mavrikakis, *J. Phys. Chem. B*, 2003, **107**, 9298-9307.
2. J. Kim, E. Samano and B. E. Koel, *Surface Science*, 2006, **600**, 4622-4632.
3. J. L. C. Fajín, M. N. D. S. Cordeiro and J. R. B. Gomes, *The Journal of Physical Chemistry C*, 2007, **111**, 17311-17321.
4. L. C. Wang, M. L. Personick, S. Karakalos, R. Fushimi, C. M. Friend and R. J. Madix, *Journal of Catalysis*, 2016, **344**, 778-783.
5. C. T. Campbell, *Surface Science*, 1985, **157**, 43-60.
6. M. Gajdoš, A. Eichler and J. Hafner, *Surface Science*, 2003, **531**, 272-286.
7. M. Yan, Z.-Q. Huang, Y. Zhang and C.-R. Chang, *Phys. Chem. Chem. Phys.*, 2017, **19**, 2364-2371.
8. P. Junell, K. Honkala, M. Hirsimäki, M. Valden and K. Lassonen, *Surface Science*, 2003, **546**, L797-L802.
9. D.-J. Liu and J. W. Evans, *Phys. Rev. B*, 2014, **89**, 205406.
10. D. A. Hickman, J. C. Degenstein and F. H. Ribeiro, *Current Opinion in Chemical Engineering*, 2016, **13**, 1-9.
